# Supplementary material for: Symptom Burden and Profiles in Concussed Children with and without Prolonged Recovery
Source: PubMed Central journal article supplement (PMC6981707; doi:10.3390/ijerph17010351), 2020-01-04
Supplement: ijerph-17-00351-s001.pdf [file ijerph-17-00351-s001.pdf]

## Supplementary Information

**Table S1.** Post-Concussive Symptom Scale.

| Symptom                  | None | Mild | Moderate | Severe |   |   |   |
|--------------------------|------|------|----------|--------|---|---|---|
|                          | 0    | 1    | 2        | 3      | 4 | 5 | 6 |
| Headache                 | 0    | 1    | 2        | 3      | 4 | 5 | 6 |
| Numbness                 | 0    | 1    | 2        | 3      | 4 | 5 | 6 |
| Nausea                   | 0    | 1    | 2        | 3      | 4 | 5 | 6 |
| Vomiting                 | 0    | 1    | 2        | 3      | 4 | 5 | 6 |
| Balance Problems         | 0    | 1    | 2        | 3      | 4 | 5 | 6 |
| Dizziness                | 0    | 1    | 2        | 3      | 4 | 5 | 6 |
| Fatigue                  | 0    | 1    | 2        | 3      | 4 | 5 | 6 |
| Trouble falling asleep   | 0    | 1    | 2        | 3      | 4 | 5 | 6 |
| Excessive sleep          | 0    | 1    | 2        | 3      | 4 | 5 | 6 |
| Sleeping less than usual | 0    | 1    | 2        | 3      | 4 | 5 | 6 |
| Drowsiness               | 0    | 1    | 2        | 3      | 4 | 5 | 6 |
| Sensitivity to light     | 0    | 1    | 2        | 3      | 4 | 5 | 6 |
| Sensitivity to noise     | 0    | 1    | 2        | 3      | 4 | 5 | 6 |
| Irritability             | 0    | 1    | 2        | 3      | 4 | 5 | 6 |
| Sadness                  | 0    | 1    | 2        | 3      | 4 | 5 | 6 |
| Nervousness              | 0    | 1    | 2        | 3      | 4 | 5 | 6 |
| Feeling more emotional   | 0    | 1    | 2        | 3      | 4 | 5 | 6 |
| Mentally foggy           | 0    | 1    | 2        | 3      | 4 | 5 | 6 |
| Feeling slowed down      | 0    | 1    | 2        | 3      | 4 | 5 | 6 |
| Difficulty remembering   | 0    | 1    | 2        | 3      | 4 | 5 | 6 |
| Difficulty concentrating | 0    | 1    | 2        | 3      | 4 | 5 | 6 |
| Vision problems          | 0    | 1    | 2        | 3      | 4 | 5 | 6 |

Directions: Use the scale to complete the following table. 0 =no symptoms to 6 = severest symptoms.
